# Supplementary material for: Should Trust Be Stressed? General Trust and Proactive Coping as Buffers to Perceived Stress
Source: Front Psychol. 2020 Nov 13;11:554962. doi: 10.3389/fpsyg.2020.554962 (PMC7691599; doi:10.3389/fpsyg.2020.554962)
Supplement: Supplementary file 1 [file Table_1.xlsx]

## Sheet: Sheet3
Table 1. Supplemental correlation table of PSS-10, GTS, IUS (including subscales), and HEXACO (including factors and facets)
	1	2	3	4	5	6	7	8	9	10	11	12	13	14	15	16	17	18	19	20	21	22	23	24	25	26	27	28	29	30	31	32	33	34	35
1. PSS10	1
2. GTS	-0.3554	1
	0
3. IUS (total)	0.4718	-0.1136	1
	0	0.0001
4. IUS (subscale Inhibitory)	0.5311	-0.1755	0.8982	1
	0	0	0
5. IUS (subscale Prospective)	0.3403	-0.0401	0.9219	0.6578	1
	0	0.163	0	0
6. Honesty-Humility (HH)	-0.2523	0.0818	-0.2237	-0.2608	-0.1534	1
	0	0.0044	0	0	0
7. HH (Sincerity)	-0.0831	0.0037	-0.0978	-0.1223	-0.0598	0.6946	1
	0.0038	0.8987	0.0006	0	0.0375	0
8. HH (Fairness)	-0.3043	0.1865	-0.1621	-0.2299	-0.0751	0.7986	0.3685	1
	0	0	0	0	0.0088	0	0
9. HH (Greed-Avoidance)	-0.1413	0.0279	-0.1397	-0.1133	-0.1395	0.5989	0.2214	0.3224	1
	0	0.3321	0	0.0001	0	0	0	0
10. HH (Modesty)	-0.1096	-0.0598	-0.2269	-0.2354	-0.1814	0.5927	0.2425	0.2733	0.2395	1
	0.0001	0.0373	0	0	0	0	0	0	0
11. Emotionality (Em)	0.4832	-0.1385	0.4312	0.4442	0.3474	-0.0065	-0.02	-0.0021	-0.0286	0.0346	1
	0	0	0	0	0	0.8224	0.4859	0.9417	0.3201	0.2279
12. Em (Fearfulness)	0.3517	-0.1111	0.4003	0.4431	0.2954	-0.0381	-0.0342	-0.0274	-0.02	-0.0205	0.7891	1
	0	0.0001	0	0	0	0.1844	0.234	0.3405	0.4862	0.4765	0
13. Em (Anxiety)	0.553	-0.2314	0.4002	0.3832	0.3479	-0.0289	0.0265	-0.0856	-0.0714	0.0766	0.7062	0.4239	1
	0	0	0	0	0	0.3138	0.3562	0.0028	0.0129	0.0076	0	0
14. Em (Dependence)	0.3292	-0.0414	0.2393	0.2752	0.1676	-0.1193	-0.1237	-0.0731	-0.0601	-0.0658	0.673	0.3933	0.3248	1
	0	0.1491	0	0	0	0	0	0.0109	0.0363	0.022	0	0	0
15. Em Sentimentality	0.1987	-0.025	0.2014	0.1748	0.1911	0.1441	0.0587	0.1556	0.0522	0.1051	0.7202	0.3627	0.3529	0.3374	1
	0	0.3837	0	0	0	0	0.0409	0	0.0689	0.0002	0	0	0	0
16. Extraversion (Ex)	-0.5283	0.3746	-0.3309	-0.4179	-0.1988	0.1014	0.027	0.2379	0.0451	-0.1237	-0.3538	-0.3181	-0.4401	-0.1928	-0.0849	1
	0	0	0	0	0	0.0004	0.3466	0	0.1163	0	0	0	0	0	0.0031
17. Ex (Social Self-Esteem)	-0.6638	0.3435	-0.3985	-0.4939	-0.2475	0.2139	0.0833	0.3097	0.083	0.0285	-0.3956	-0.3139	-0.4459	-0.2525	-0.1524	0.7935	1
	0	0	0	0	0	0	0.0037	0	0.0038	0.3214	0	0	0	0	0	0
18. Ex (Social Boldness)	-0.1833	0.1939	-0.1477	-0.2086	-0.0694	-0.0589	-0.0437	0.0573	-0.0367	-0.1986	-0.2465	-0.2736	-0.254	-0.1013	-0.0712	0.7633	0.3587	1
	0	0	0	0	0.0157	0.0404	0.1283	0.0458	0.2009	0	0	0	0	0.0004	0.0132	0	0
19. Ex (Sociability)	-0.144	0.3043	-0.0935	-0.1026	-0.0698	-0.0376	-0.0322	0.0809	0.0248	-0.2391	-0.0548	-0.0643	-0.1932	0.0159	0.0741	0.6825	0.2845	0.5169	1
	0	0	0.0011	0.0003	0.0151	0.191	0.262	0.0048	0.3889	0	0.0565	0.025	0	0.581	0.0098	0	0	0
20. Ex (Liveliness)	-0.5582	0.2951	-0.3267	-0.4121	-0.1966	0.1716	0.0672	0.2533	0.0673	0.0137	-0.3184	-0.2634	-0.4153	-0.2099	-0.0574	0.7726	0.6377	0.3926	0.3837	1
	0	0	0	0	0	0	0.0193	0	0.0191	0.6326	0	0	0	0	0.0457	0	0	0	0
21. Agreeableness (Ag)	-0.3555	0.2932	-0.2265	-0.2334	-0.1823	0.3317	0.2061	0.3181	0.1809	0.1583	-0.1569	-0.1301	-0.2736	-0.1257	0.0482	0.3602	0.3482	0.102	0.2685	0.4037	1
	0	0	0	0	0	0	0	0	0	0	0	0	0	0	0.0933	0	0	0.0004	0	0
22. Ag (Forgiveness)	-0.2292	0.2774	-0.1246	-0.1086	-0.1178	0.1956	0.1076	0.2053	0.1864	0.006	-0.1231	-0.0987	-0.246	-0.0697	0.0377	0.2849	0.2106	0.113	0.2862	0.3	0.7014	1
	0	0	0	0.0002	0	0	0.0002	0	0	0.8354	0	0.0006	0	0.0152	0.1896	0	0	0.0001	0	0	0
23. Ag (Gentleness)	-0.1864	0.1803	-0.1185	-0.1036	-0.1118	0.2654	0.1812	0.2167	0.1565	0.1562	-0.0099	-0.0218	-0.1269	-0.0219	0.1225	0.1755	0.1788	-0.0131	0.1618	0.2404	0.7805	0.4168	1
	0	0	0	0.0003	0.0001	0	0	0	0	0	0.7306	0.4479	0	0.4466	0	0	0	0.6476	0	0	0	0
24. Ag (Flexibility)	-0.275	0.181	-0.2109	-0.2006	-0.1846	0.2636	0.159	0.2654	0.1061	0.1475	-0.113	-0.0867	-0.1973	-0.0871	0.0243	0.3061	0.302	0.1121	0.2134	0.3117	0.7621	0.3458	0.4666	1
	0	0	0	0	0	0	0	0	0.0002	0	0.0001	0.0025	0	0.0024	0.3978	0	0	0.0001	0	0	0	0	0
25. Ag (Patience)	-0.3659	0.2303	-0.2148	-0.2837	-0.118	0.2449	0.1535	0.246	0.0791	0.1495	-0.2333	-0.189	-0.2443	-0.2052	-0.0569	0.299	0.3401	0.0951	0.1254	0.3405	0.6813	0.3131	0.3582	0.3839	1
	0	0	0	0	0	0	0	0	0.0058	0	0	0	0	0	0.0476	0	0	0.0009	0	0	0	0	0	0
26. Conscientiousness (Co)	-0.3439	0.1307	-0.1486	-0.3371	0.0425	0.4009	0.2186	0.4328	0.0805	0.2844	-0.1204	-0.1852	-0.0437	-0.191	0.067	0.3322	0.4242	0.1761	0.0198	0.3268	0.26	0.0496	0.1437	0.2535	0.323	1
	0	0	0	0	0.1387	0	0	0	0.005	0	0	0	0.1283	0	0.0196	0	0	0	0.491	0	0	0.0841	0	0	0
27. Co (Organization)	-0.3617	0.1732	-0.1313	-0.2774	0.0195	0.2835	0.1407	0.3057	0.0801	0.1973	-0.1376	-0.1615	-0.1279	-0.1583	0.0387	0.2848	0.3739	0.1223	0.0363	0.2845	0.2628	0.0977	0.1628	0.2265	0.29	0.7616	1
	0	0	0	0	0.4974	0	0	0	0.0053	0	0	0	0	0	0.1781	0	0	0	0.2068	0	0	0.0007	0	0	0	0
28. Co (Diligence)	-0.2329	0.1293	-0.1411	-0.2893	0.0132	0.3269	0.1946	0.3644	0.0699	0.1884	-0.0728	-0.1656	-0.0186	-0.1199	0.0981	0.3842	0.3725	0.2204	0.1853	0.3744	0.2271	0.0933	0.1395	0.2178	0.2171	0.7383	0.4493	1
	0	0	0	0	0.6464	0	0	0	0.0149	0	0.0112	0	0.5183	0	0.0006	0	0	0	0	0	0	0.0011	0	0	0	0	0
29. Co (Perfectionism)	-0.1103	0.1179	0.0542	-0.1017	0.1825	0.18	0.1266	0.2496	-0.0117	0.0482	-0.0104	-0.092	0.0768	-0.1128	0.0993	0.1784	0.1886	0.1496	0.0419	0.1263	0.1208	0.0398	0.0664	0.1065	0.1459	0.7245	0.4132	0.4543	1
	0.0001	0	0.059	0.0004	0	0	0	0	0.6836	0.0933	0.7169	0.0013	0.0074	0.0001	0.0005	0	0	0	0.1448	0	0	0.1662	0.0208	0.0002	0	0	0	0
30. Co (Prudence)	-0.3379	0.0187	-0.221	-0.3513	-0.0691	0.4107	0.2003	0.392	0.1035	0.3842	-0.139	-0.1535	-0.0687	-0.1796	-0.0075	0.2161	0.3713	0.079	-0.1219	0.2517	0.2017	-0.0364	0.0919	0.2276	0.317	0.8111	0.5186	0.4684	0.3425	1
	0	0.516	0	0	0.0161	0	0	0	0.0003	0	0	0	0.0167	0	0.7928	0	0	0.0059	0	0	0	0.2055	0.0013	0	0	0	0	0	0
31 . Openness to Experience (O)	-0.0794	0.1332	-0.1067	-0.1645	-0.0379	0.0636	0.0541	0.1089	-0.0496	0.015	-0.0962	-0.1812	-0.0722	-0.0826	0.0676	0.3047	0.1932	0.2876	0.1972	0.2471	0.1855	0.1335	0.0715	0.1809	0.1632	0.2721	0.1123	0.3189	0.2458	0.1741	1
	0.0057	0	0.0002	0	0.1869	0.0269	0.0597	0.0001	0.0842	0.6012	0.0008	0	0.0119	0.004	0.0186	0	0	0	0	0	0	0	0.0127	0	0	0	0.0001	0	0	0
32. O (Aesthetic Appreciation)	-0.0709	0.1156	-0.1027	-0.1082	-0.0806	0.0376	0.0231	0.0909	-0.0366	-0.0156	-0.0356	-0.0748	-0.1018	-0.0222	0.091	0.2071	0.1115	0.187	0.181	0.1625	0.1797	0.1498	0.0977	0.1516	0.1305	0.1467	0.0454	0.1863	0.1389	0.0902	0.7721	1
	0.0136	0.0001	0.0003	0.0002	0.005	0.1904	0.422	0.0015	0.203	0.5866	0.2152	0.0091	0.0004	0.4391	0.0015	0	0.0001	0	0	0	0	0	0.0007	0	0	0	0.1142	0	0	0.0017	0
33. O (Inquisitiveness)	-0.158	0.1859	-0.1134	-0.1767	-0.0385	0.1024	0.0637	0.1554	0.0086	0.0017	-0.1558	-0.2116	-0.0894	-0.116	-0.0205	0.2734	0.2662	0.1951	0.1337	0.2063	0.1398	0.1314	-0.004	0.1219	0.1754	0.2522	0.1341	0.2789	0.1575	0.2083	0.6886	0.4339	1
	0	0	0.0001	0	0.1799	0.0004	0.0265	0	0.7655	0.9532	0	0	0.0018	0.0001	0.4757	0	0	0	0	0	0	0	0.8893	0	0	0	0	0	0	0	0	0
34. O (Creativity)	0.0104	0.0521	-0.0457	-0.0857	-0.0027	0.0208	0.054	0.0548	-0.0524	-0.0374	-0.0289	-0.0922	-0.0184	-0.0525	0.082	0.2334	0.1031	0.2486	0.1892	0.181	0.1081	0.0689	0.0579	0.1325	0.054	0.1772	0.0505	0.2262	0.2347	0.0566	0.7704	0.4547	0.315	1
	0.7164	0.0696	0.1119	0.0028	0.9245	0.4697	0.0602	0.0566	0.0681	0.1925	0.3142	0.0013	0.5226	0.0677	0.0042	0	0.0003	0	0	0	0.0002	0.0165	0.0437	0	0.0603	0	0.0785	0	0	0.0486	0	0	0
35. O (Unconventionality)	-0.0455	0.0645	-0.0678	-0.1356	0.0033	0.0418	0.021	0.0387	-0.0589	0.1066	-0.0877	-0.183	-0.0167	-0.0656	0.0326	0.201	0.1209	0.2192	0.0731	0.1921	0.132	0.0579	0.0528	0.1327	0.1487	0.2498	0.1198	0.2699	0.1898	0.1914	0.7425	0.4147	0.4121	0.4097	1
	0.113	0.0248	0.0181	0	0.909	0.1459	0.4642	0.1775	0.0402	0.0002	0.0022	0	0.5615	0.0223	0.2563	0	0	0	0.0109	0	0	0.0439	0.0659	0	0	0	0	0	0	0	0	0	0	0
